# Supplementary material
Source: PubMed Central journal article supplement (PMC2662720)
Supplement: NIHMS84406-supplement-Four-D_sup.pdf [file NIHMS84406-supplement-Four-D_sup.pdf]

# Four-dimensional Docking: a Fast and Accurate Account of the Receptor Flexibility in Ligand Docking

*Giovanni Bottegoni<sup>§</sup>, Irina Kufareva<sup>§</sup>, Maxim Totrov<sup>‡</sup>, and Ruben Abagyan<sup>§‡\*</sup>*

Dept. of Molecular Biology, The Scripps Research Institute, 10550 N Torrey Pines Rd., La Jolla, CA 92037, USA and Molsoft, LLC, 3366 N Torrey Pines Ct. Suite 300, La Jolla, CA 92037, USA

\* To whom correspondence should be addressed: Dept. of Molecular Biology, TPC28, The Scripps Research Institute, 10550 N Torrey Pines Rd., La Jolla, CA 92037, USA. E-mail: abagyan@scripps.edu, Tel: 00 1 (858) 784 8543, Fax: 00 1 (858) 784 8299

§ The Scripps Research Institute; ‡ Molsoft, LLC

**Supplementary Information**

## Materials and Methods

**Table 1S.** 4D Docking Benchmark: PDB structures

| Name  | Source | UniProt | PDBid Receptor                                                                                                         | PDBid Ligands                                        |
|-------|--------|---------|------------------------------------------------------------------------------------------------------------------------|------------------------------------------------------|
| CHK1  | human  | O14757  | 2BR1, 2HXL, 2HXQ, 2HOG, 2HY0, 2C3K, 2BRG, 2BRH, 2BRB, 2BRM, 2CGU, 1ZLT, 2CGV, 2C3L, 1IA8, 1NVQ, 1NVR, 1NVS, 1ZYS       | 2BR1, 2C3K, 2BRH, 2BRB, 2BRM, 1NVQ, 1NVR             |
| STK6  | human  | O14965  | 2NP8, 2J4Z, 1MQ4, 2DWB                                                                                                 | 2J4Z                                                 |
| PDPK1 | human  | O15530  | 1UU8, 1UU9, 1UU7, 1Z5M, 2PE2, 2PE1, 2PE0, 1H1W, 1OKY, 1OKZ, 1UU3                                                       | 2PE1, 1OKY, 1OKZ                                     |
| PTGD2 | human  | O60760  | 2CVD, 1IYH, 1IYI                                                                                                       | 2CVD                                                 |
| PDE5A | human  | O76074  | 1XOZ, 2CHM, 1TBF, 1T9S                                                                                                 | 1XOZ, 1TBF                                           |
| DYR   | human  | P00374  | 1S3U, 1MVS, 1DHF, 1S3V                                                                                                 | 1S3U, 1MVS, 1S3V                                     |
| DYR   | human  | P00374  | 1PD8, 1S3W, 1KMS, 1KMV, 1OHJ                                                                                           | 1KMS                                                 |
| ABL1  | mouse  | P00520  | 1FPU, 1M52, 2HZ0, 2HZI, 2F4J, 2GQG, 2HIW, 1IEP, 2G1T, 2QOH                                                             | 1M52, 2HZ0, 2HZI, 1IEP, 2QOH                         |
| SRC   | chick  | P00523  | 2BDF, 2BDJ, 1Y57, 2OIQ, 2H8H, 1FMK, 1YI6, 2SRC                                                                         | 2H8H                                                 |
| THRB  | human  | P00734  | 1KTT, 1K22, 1MU6, 2BXT, 2JH0, 1BHX, 1D4P, 1G32, 1MU8, 1MUE, 1O5G, 1QBV, 1T4U, 1TOM, 1ZGI, 2A2X, 2FEQ, 2FES, 2JH5, 2JH6 | 1KTT, 2JH0, 1G32, 2JH5, 2JH6                         |
| FA10  | human  | P00742  | 1NFU, 1NFY, 2J2U, 2J34, 2J38, 1F0R, 1F0S, 1IQM, 1XKA, 2CJI, 2D1J, 2J94, 2J95, 2UWO, 1LPK, 1LPZ, 1NFW, 2BOK, 2UWL, 2UWP | 2J2U, 2J34, 2J38, 2CJI, 2J95, 2UWO, 1LPZ, 2UWL       |
| UROK  | human  | P00749  | 1SC8, 1SQA, 1GJ9, 1OWD, 1GJ7, 1EJN, 1GJ8, 1GJB, 1O3P, 1OWH, 1SQT, 1GJD, 1OWE, 1U6Q, 1GI9, 1SQO, 1GI7, 1GI8             | 1GJ7, 1O3P, 1SQT, 1U6Q, 1SQO                         |
| TRY1  | bovin  | P00760  | 1F0T, 1K1P, 1QB6, 1G36, 1O2R, 1O2U, 1QBN, 1K1L, 1MTW, 1O2T, 1AZ8, 1BJV, 1F0U, 1GJ6                                     | 1F0T, 1K1P, 1K1L, 1GJ6                               |
| TRY1  | bovin  | P00760  | 1Y59, 1Y5A, 1Y5B, 1Y5U                                                                                                 | 1Y5A, 1Y5U                                           |
| RENI  | human  | P00797  | 2G1R, 2IKU, 2G1Y, 2G22, 2G1S, 2G24, 2G21, 2I4Q, 2IL2, 1BIL, 1HRN, 1RNE, 2BKS, 2BKT, 2FS4, 2G20, 2G26, 2REN, 2V0Z       | 2G1Y, 2G22, 2G24, 2IL2, 2BKT                         |
| AEQ2  | aeqvi  | P02592  | 1UHH, 1EJ3, 1UHJ, 1UHK, 1SL8, 1UHI                                                                                     | 1UHH, 1UHJ, 1UHK, 1UHI                               |
| RETBP | human  | P02753  | 1FEL, 1ERB, 1AQB, 1BRQ, 1FEM, 1FEN, 1HBQ, 1JYD, 1JYJ                                                                   | 1AQB                                                 |
| ALBU  | human  | P02768  | 2BXK, 2BXM, 2BXQ, 2BXO, 1H9Z, 1HA2, 2BXA, 2BXH, 1E7A, 2BXL, 1AO6, 1BJ5, 1BM0, 1BM0, 1E78, 1E7B, 1E7C, 1E7E             | 1HA2                                                 |
| KITH  | hhv11  | P03176  | 1KI4, 1E2N, 1E2K, 1OF1, 1E2P, 1E2M, 1E2H, 1KI2, 1KI3, 1KI6, 1KI7, 1KI8, 1QHI, 2KI5                                     | 1KI4, 1E2N, 1QHI                                     |
| ESR1  | human  | P03372  | 1ZKY, 2FAI                                                                                                             | 1ZKY, 2FAI                                           |
| ESR1  | human  | P03372  | 1ERR, 1XQC, 1YIN                                                                                                       | 1ERR, 1XQC, 1YIN                                     |
| ESR1  | human  | P03372  | 2OUZ, 1XP9, 1XPC, 1YIM, 1XP1, 1XP6, 1L2I                                                                               | 2OUZ, 1XP9, 1XPC, 1YIM, 1L2I                         |
| FA11  | human  | P03951  | 1ZRK, 1ZSK, 1ZSJ, 1XX9, 1XXF, 1ZHM, 1ZJD                                                                               | 1ZRK, 1ZSK, 1ZSJ                                     |
| ACES  | torca  | P04058  | 1EVE, 1H22, 1UT6, 1E66, 1ODC, 1ZGB, 1ZGC, 1DX6, 1GPN, 1W4L, 1GPK, 1U65, 2ACK, 1VOT, 1EA5, 1H23                         | 1E66, 1W4L                                           |
| SHBG  | human  | P04278  | 1LHN, 1LHO, 1LHU                                                                                                       | 1LHN, 1LHO, 1LHU                                     |
| POL   | hv1ma  | P04588  | 1EP4, 2BE2, 1S9E, 1C1B, 1C0U, 1VRU, 1C1C, 1RT1, 1TKT, 1FK9, 1REV, 2OPP                                                 | 1EP4, 2BE2, 1S9E, 1C1B, 1C0U, 1C1C, 1TKT, 1FK9, 2OPP |
| KAPCA | mouse  | P05132  | 2GU8, 1REJ, 1YDT, 1RE8                                                                                                 | 2GU8, 1YDT                                           |

|       |       |        |                                                                                                                        |                                                                              |
|-------|-------|--------|------------------------------------------------------------------------------------------------------------------------|------------------------------------------------------------------------------|
| KAPCA | mouse | P05132 | 2F7E, 2JDS, 2OH0, 2C1B, 2OJF, 2C1A, 2F7X, 2UZW, 2UZT, 2UZV, 1SVH                                                       | 2JDS                                                                         |
| IPNS  | emeni | P05326 | 1QJF, 1BK0, 1HB1, 1HB2, 1IPS, 1OBN, 1QIQ, 1QJE, 1UZW, 1W03, 1W05, 1W3V                                                 | 1W3V                                                                         |
| HEPS  | human | P05981 | 1O5F, 1P57                                                                                                             | 1O5E                                                                         |
| PRGR  | human | P06401 | 1A28, 1SR7, 1SQN, 1ZUC                                                                                                 | 1A28, 1SR7, 1SQN                                                             |
| NRAM  | iatok | P06820 | 1ING, 1INH, 1IVD, 1IVC, 1IVE, 1INW, 1INX, 1IVF, 1IVG, 1IVG, 1NN2, 2BAT                                                 | 1IVF                                                                         |
| HS90A | human | P07900 | 1UYF, 1UYE, 2H55, 1UYD, 2BYI, 2FWY, 2FWZ, 1UY6, 1UYI, 1YC1, 2BSM, 2UWD, 1UYH, 2BT0, 2BYH, 1UYC, 1UYK, 1UY9             | 1UYF, 1UYE, 1UYD, 2FWZ, 1UY6, 1UYI, 1YC1, 2BSM, 2UWD, 2BYH, 1UYC, 1UYK, 1UY9 |
| MCR   | human | P08235 | 2AAX, 2AB2, 1YA3, 1Y9R                                                                                                 | 2AAX, 2AB2, 1YA3, 1Y9R                                                       |
| FA7   | human | P08709 | 2BZ6, 2F9B, 1O5D, 2FLR, 2FLB, 2AEI, 2C4F, 1CVW, 1DAN, 1KLI, 1WQV, 1WSS, 1WTG, 1WUN, 1YGC                               | 2BZ6, 2FLB                                                                   |
| MYS2  | dicdi | P08799 | 1YV3, 1FMV, 1JWY, 1JX2, 1LVK, 1MMA, 1MMD, 1MND, 1VOM                                                                   | 1YV3                                                                         |
| CP51  | myctu | P0A512 | 1EA1, 1E9X, 1U13, 1X8V, 2BZ9                                                                                           | 1X8V                                                                         |
| INHA  | myctu | P0A5Y6 | 2H7M, 2H7N, 2H7P, 2H7L, 2H7I, 1ENY, 1P45, 2AQ8, 2AQH, 2AQI, 2AQK, 2H9I, 2IDZ, 2IE0, 2IEB, 2NSD, 2NTJ                   | 2H7M, 2H7P, 2H7L, 2H7I                                                       |
| TETR4 | ecolx | P0ACT4 | 2O7O, 2TRT, 1ORK                                                                                                       | 2O7O                                                                         |
| AMPM  | ecoli | P0AE18 | 2GG0, 2GG2, 2GG5, 2EVC, 2GG7, 2EVM, 2EVO, 2GG3, 1XNZ, 2BB7, 1YVM, 1C21, 1C22, 1C23, 1C24, 1C27, 1MAT, 2GG8, 2GG9, 2GGB | 2GG0                                                                         |
| THB1  | human | P10828 | 1N46, 1NQ0, 1XZX                                                                                                       | 1N46, 1XZX                                                                   |
| PNMT  | human | P11086 | 2G8N, 2G72, 2G70, 1HNN, 1YZ3, 2AN3, 2AN5, 2AN4, 2ONY                                                                   | 2G8N, 2G72                                                                   |
| PIM1  | human | P11309 | 1XWS, 1YI3, 2C3I, 2O63, 2O64, 2OBJ, 2O3P, 1YXX, 1YXV, 1XQZ, 1XR1, 1YHS, 1YI4, 1YWV, 1YXU, 2BZH                         | 1XWS, 1YI3, 2C3I, 1YHS                                                       |
| VDR   | human | P11473 | 1DB1, 1S19, 1TXI, 2HB8, 1IE8, 1S0Z, 2HAM, 2HAR, 1IE9, 2HAS, 2HB7                                                       | 1DB1, 1S19, 1TXI, 2HB8, 1IE8, 1S0Z, 2HAM, 2HAR, 1IE9, 2HAS, 2HB7             |
| UNG   | human | P13051 | 2HXM, 1AKZ, 1EMH, 1EMJ, 1Q3F, 1UGH, 1YUO                                                                               | 2HXM                                                                         |
| VDR   | rat   | P13053 | 1DB1, 1RJK, 1RKH, 2O4J, 1IE8, 1RKG, 1IE9                                                                               | 1DB1, 1RJK, 2O4J, 1IE8, 1RKG, 1IE9                                           |
| FABPA | human | P15090 | 2NNQ, 1TOU, 1TOW                                                                                                       | 2NNQ                                                                         |
| ALDR  | human | P15121 | 1PWL, 1T40, 1EL3, 2NVC, 1IEI, 1Z3N, 2IKJ, 1US0, 2FZB, 2IKI, 2PEV, 2NVD, 1Z89, 1X97, 1X98, 2IKG                         | 1PWL, 1T40, 1IEI, 1Z3N, 2IKJ, 1US0, 2IKI, 1Z89, 2IKG                         |
| ANDR  | rat   | P15207 | 2AMB, 2IHQ, 2AX9, 1E3G, 1I37, 1T5Z                                                                                     | 2AMB, 1E3G, 1T5Z                                                             |
| ANDR  | rat   | P15207 | 1XNN, 2AX7, 2OZ7, 2AX6                                                                                                 | 1XNN, 2AX7, 2OZ7                                                             |
| DYR   | pneca | P16184 | 1KLK, 1VJ3, 2FZI, 1S3Y, 1LY3, 1LY4, 2FZH, 1DYR, 1CD2, 1DAJ, 1E26, 3CD2                                                 | 2FZI, 1S3Y, 1LY3, 1LY4, 2FZH                                                 |
| PTN1  | human | P18031 | 1KAV, 1Q1M, 1BZC, 1L8G, 1XBO, 2F6V, 1T48, 2F70, 2F71, 2CMC, 1ONZ, 2CM7, 2F6T, 2F6Y, 2F6Z, 1NO6, 2CNF, 1KAK, 2CNG       | 2F6T, 2F6Y                                                                   |
| RXRA  | human | P19793 | 1RDT, 1MVC, 1XVP, 1FM6, 1G1U, 1G5Y, 1MV9, 2P1T, 2P1U, 2P1V                                                             | 1FM6, 2P1T, 2P1U, 2P1V                                                       |
| ITAL  | human | P20701 | 1CQP, 1RD4, 1LFA, 1XDD, 1XDG, 1XUO, 1ZON, 1ZOP                                                                         | 1CQP                                                                         |
| ACES  | mouse | P21836 | 1N5R, 2GYV, 1J07, 2GYU, 2GYW, 1J06, 1KU6, 1N5M, 1Q84, 2HA3                                                             | 2GYW                                                                         |
| COMT  | rat   | P22734 | 1H1D, 1JR4, 2CL5, 1VID                                                                                                 | 1JR4                                                                         |
| GRIK1 | rat   | P22756 | 2F34, 2F35, 2PBW, 1VSO, 1TXF, 1YCJ, 1YCJ, 2F36                                                                         | 2F34, 2PBW                                                                   |

|       |       |        |                                                                                                                                    |                                                      |
|-------|-------|--------|------------------------------------------------------------------------------------------------------------------------------------|------------------------------------------------------|
| MMP8  | human | P22894 | 1BZS, 1ZS0, 1ZVX, 1MNC, 1JJ9, 1ZP5, 1A85, 1A86, 1I73, 1JAN, 1JAO, 1JAP, 1JAP, 1JAP, 1JAP, 1JAP, 1KBC, 1MMB, 2OY2, 2OY2, 2OY4, 2OY4 | 1BZS, 1JJ9, 1ZP5                                     |
| RARG2 | human | P22932 | 1EXA, 1EXX, 1FCX, 1FCZ, 1FCY, 1FD0, 2LBD                                                                                           | 1EXA, 1FCX, 1FCZ, 1FCY, 2LBD                         |
| PTPRB | human | P23467 | 2H02, 2H04, 2I5X, 2AHS, 2H03, 2HC1, 2HC2, 2I3R, 2I4E, 2I4G                                                                         | 2H04                                                 |
| CDK2  | human | P24941 | 1YKR, 2B54, 2FVD, 1H08, 2B52, 1H1S, 1OIU, 2C5Y                                                                                     | 2B54, 2FVD, 1H1S, 1OIU                               |
| CDK2  | human | P24941 | 1CKP, 1G5S, 2B55, 2BHH, 1KE7, 1R78                                                                                                 | 2B55, 2BHH, 1KE7                                     |
| POLG  | hcvj6 | P26660 | 1YVZ, 1YVX, 1YUY, 1YV2                                                                                                             | 1YVX                                                 |
| POLG  | hcvja | P26662 | 2GIQ, 2FVC, 1YVF, 2D41, 2I1R, 2JC0, 2JC1, 1NHU, 2D3U, 2GIR, 2D3Z, 2HWI, 1OS5, 2HWH, 2O5D, 2GC8, 1C2P                               | 2JC1                                                 |
| DPP4  | human | P27487 | 2FJP, 2P8S, 1X70, 2IIT, 1RWQ, 2HHA, 2IIV, 2OGZ, 2OPH, 1N1M, 1J2E, 1NU6, 1NU8, 1PFQ, 1R9M, 1R9N, 1TK3, 1WCY, 2AJL                   | 1X70                                                 |
| DCK   | human | P27707 | 1P62, 2NO6, 2NO9, 2NOA, 1P5Z, 1P60, 2A7Q, 2NO7                                                                                     | 2A7Q                                                 |
| NRAM  | inbbe | P27907 | 1B9V, 1B9T, 1B9S, 1INF, 1IVB, 1A4G, 1A4Q, 1INV, 1NSB, 1NSC, 1NSD                                                                   | 1B9V, 1B9T, 1B9S                                     |
| CFI1  | medsa | P28012 | 1EYQ, 1FM7, 1FM8, 1JEP, 1EYP                                                                                                       | 1EYQ                                                 |
| MK01  | human | P28482 | 2OJJ, 1WZY, 2OJI, 1TVO, 3ERK, 4ERK, 2OJG, 1ERK, 2ERK, 2FYS, 2GPH                                                                   | 2OJJ, 1WZY, 1TVO                                     |
| TGT   | zymmo | P28720 | 1Y5X, 1Y5W, 1Y5V, 1Q66, 1N2V, 1F3E, 1ENU, 1P0B, 1Q4W, 1S38, 1K4G, 1K4H, 1P0D, 1PUD                                                 | 1Y5W                                                 |
| DHI1  | human | P28845 | 2ILT, 2BEL, 1XU7                                                                                                                   | 2ILT, 2BEL                                           |
| RABP2 | human | P29373 | 2CBS, 1CBQ, 1CBS, 2FS6, 2FS7, 3CBS                                                                                                 | 2CBS, 1CBQ, 1CBS, 3CBS                               |
| NOS1  | rat   | P29476 | 1VAG, 1K2U, 1K2R, 1K2S, 1LZX, 1OM5, 1QWC, 1K2T, 1LZZ, 1M00, 1MMV, 1MMW, 1OM4, 1P6H, 1P6I, 1P6J, 1QW6, 1RS6, 1RS7                   | 1VAG                                                 |
| WEE1  | human | P30291 | 1X8B, 2IN6, 2IO6                                                                                                                   | 1X8B, 2IN6, 2IO6                                     |
| AKT2  | human | P31751 | 2JDR, 2JDO, 2UW9, 1GZK, 1GZN, 1O6K                                                                                                 | 2JDR, 2UW9                                           |
| MMP13 | mouse | P33435 | 1XUD, 1YOU, 1XUC, 2OW9, 456C, 1XUR, 1ZTQ, 2D1N, 2E2D, 2OZR                                                                         | 2OW9                                                 |
| KES1  | yeast | P35844 | 1ZHZ, 1ZHW, 1ZHX, 1ZHY, 1ZI7                                                                                                       | 1ZHZ, 1ZHT, 1ZHX, 1ZHY                               |
| POL   | hv1y2 | P35963 | 1EP4, 2BE2, 1S9E, 1C1B, 1C0U, 1VRU, 1C1C, 1RT1, 1TKT, 1FK9, 1REV, 2OPP                                                             | 1EP4, 2BE2, 1S9E, 1C1B, 1C0U, 1C1C, 1TKT, 1FK9, 2OPP |
| POL   | hv1y2 | P35963 | 1EP4, 2BE2, 1S9E, 1C1B, 1C0U, 1VRU, 1C1C, 1RT1, 1TKT, 1FK9, 1REV, 2OPP                                                             | 1EP4, 2BE2, 1S9E, 1C1B, 1C0U, 1C1C, 1TKT, 1FK9, 2OPP |
| PPARG | human | P37231 | 2G0G, 2I4J, 2I4P, 2ATH, 1FM6, 2G0H, 1K74, 2F4B, 2HFP, 1PRG, 2I4Z                                                                   | 1FM6, 2F4B                                           |
| MMP12 | human | P39900 | 2HU6, 1UTZ, 1JIZ, 1UTT, 1ROS, 1RMZ, 1OS2, 1OS9, 1Y93, 2OXU, 2OXW, 2OXZ                                                             | 1UTT, 1ROS, 1RMZ                                     |
| ENPL  | canfa | P41148 | 2FYP, 1QY5, 1QY8, 1QYE, 1TBW, 1TC0, 1U0Y, 1U0Z, 1YT1                                                                               | 1QY5, 1U0Y                                           |
| ENPL  | canfa | P41148 | 1U0Z, 2H8M, 2HCH, 2HG1                                                                                                             | 2HCH                                                 |
| AK1C3 | human | P42330 | 1ZQ5, 1S2A, 1S2C, 1RY0, 1RY8, 1S1P, 1S1R, 1XF0, 2F38                                                                               | 1ZQ5                                                 |
| KSYK  | human | P43405 | 1XBB, 1XBA, 1XBC                                                                                                                   | 1XBC                                                 |
| MK14  | mouse | P47811 | 1W83, 1WBN, 2GTM, 1A9U, 1M7Q, 1WBS, 1WBT, 1W82, 1BL7, 1WBV                                                                         | 2GTM, 1M7Q                                           |
| MK14  | mouse | P47811 | 2GTN, 2BAL, 1ZZ2                                                                                                                   | 2GTN, 2BAL                                           |
| PK3CG | human | P48736 | 1E7V, 1E8W, 1E8X, 1E8Y, 1E8Z, 2CHW, 2CHX, 2CHZ                                                                                     | 1E7V, 1E8W                                           |
| AMPM2 | human | P50579 | 1YW9, 1QZY, 1R58, 1R5H, 2OAZ, 1YW7, 2ADU, 1BN5, 1KQ0, 1KQ9, 1R5G, 2GA2                                                             | 1QZY, 1R58, 1R5G                                     |

|       |       |        |                                                                                                            |                              |
|-------|-------|--------|------------------------------------------------------------------------------------------------------------|------------------------------|
| BLAB  | serma | P52699 | 1DD6, 1JJT, 2DOO, 1JJE                                                                                     | 1JJT                         |
| BLA1  | xanma | P52700 | 2AIO, 2GFJ, 2GFK, 2FU9, 2HB9, 1SML, 2FM6, 2FU8, 2QDT                                                       | 2AIO, 2GFJ                   |
| KIF11 | human | P52732 | 2FKY, 2G1Q, 2FL2, 2UYM, 2UYI, 2FL6, 2FME, 2GM1, 2PG2, 1YRS, 1Q0B, 1H6, 2Q2Y                                | 2UYM, 2UYI, 2FME, 2GM1, 2PG2 |
| MK10  | human | P53779 | 2P33, 1PMN, 2O0U, 1PMQ, 1PMV                                                                               | 1PMN                         |
| ADA   | bovin | P56658 | 1WXY, 1NDV, 1V7A, 1NDZ, 1V79, 1NDW, 1KRM, 1NDY, 1O5R, 1QXL, 1UML, 1VFL, 2E1W                               | 1WXY, 1V79, 2E1W             |
| ERR3  | human | P62508 | 1S9Q, 2EWP, 2GPP, 1TFC, 2E2R, 2GP7, 2GPO                                                                   | 1S9Q, 2GPP                   |
| ADA17 | human | P78536 | 2FV5, 2A8H, 1ZXC, 2I47, 2FV9                                                                               | 2A8H, 1ZXC                   |
| PDXK  | sheep | P82197 | 1YGK, 1LHP, 1LHP, 1LHR                                                                                     | 1YGK                         |
| CPXJ  | sacen | Q00441 | 1JIN, 1EGY, 1EUP, 1JIO                                                                                     | 1JIN                         |
| MDM2  | human | Q00987 | 1T4E, 1RV1, 1T4F, 1YCR, 2AXI, 2GV2                                                                         | 1T4E                         |
| PYRD  | human | Q02127 | 2FPT, 2FPY, 2BXV, 2FQI, 1D3G, 2FPV, 2B0M, 1D3H                                                             | 1D3G, 2B0M                   |
| PDE4B | human | Q07343 | 1XOT, 1XLX, 1XLZ, 1Y2J, 1RO6, 1Y2H, 1F0J, 1XMY, 1RO9, 1ROR                                                 | 1XLX, 1XMY                   |
| CDC2H | plafk | Q07785 | 1V0P, 1V0O, 1OB3, 1V0B                                                                                     | 1V0P, 1V0O                   |
| PDE4D | human | Q08499 | 1XOQ, 1XOM, 1XON, 2FM0, 2FM5, 1Y2K, 1OYN, 1Y2D, 1XOR, 1XOR, 1Y2E, 1Y2C, 1Y2B, 1PTW, 1Q9M, 1ZKN             | 2FM0                         |
| BGLA  | thema | Q08638 | 2CET, 2J7C, 2J7D, 2J7F, 2CBV, 2J78, 2J79, 1OD0, 1OIF, 1OIM, 1UZ1, 1W3J, 2CBU, 2CES, 2J75, 2J7B, 2J7E, 2J7G | 2CET                         |
| MTAP  | human | Q13126 | 1K27, 1CB0, 1CG6, 1SD1, 1SD2                                                                               | 1SD2                         |
| QDOI  | aspja | Q7SIC2 | 1H1I, 1H1M, 1GQH                                                                                           | 1H1I                         |
| ESR2  | human | Q92731 | 2FSZ, 1U3R, 1U3S, 1YYE, 1QKM, 1X78, 2GIU, 1X76, 1ZAF, 1U3Q, 1U9E, 1X7B, 2J7X, 2J7Y, 2JJ3, 2NV7             | 1QKM, 2GIU, 2JJ3             |

## Results and Discussion

**Table 2S.** Docking Results – Structures correctly reproduced in the top ranking solution (Detailed)

| Name  | UniProt | RC <sup>a</sup> | L <sup>b</sup> | MRC <sup>c</sup> | 4D <sup>d</sup> | XRC <sup>e</sup> | X4D <sup>f</sup> | Name  | UniProt | RC <sup>a</sup> | L <sup>b</sup> | MRC <sup>c</sup> | 4D <sup>d</sup> | XRC <sup>e</sup> | X4D <sup>f</sup> |
|-------|---------|-----------------|----------------|------------------|-----------------|------------------|------------------|-------|---------|-----------------|----------------|------------------|-----------------|------------------|------------------|
| ESR1  | P03372  | 3               | 3              | 3                | 3               | 3                | 3                | GRIK1 | P22756  | 9               | 2              | 2                | 2               | 0                | 0                |
| SHBG  | P04278  | 3               | 3              | 3                | 3               | 2                | 2                | AK1C3 | P42330  | 9               | 1              | 1                | 1               | 0                | 0                |
| HEPS  | P05981  | 3               | 1              | 0                | 1               | 1                | 1                | ABL1  | P00520  | 10              | 5              | 5                | 5               | 4                | 3                |
| THB1  | P10828  | 3               | 2              | 2                | 2               | 2                | 2                | ITAL  | P20701  | 10              | 1              | 1                | 0               | 0                | 0                |
| FABPA | P15090  | 3               | 1              | 1                | 0               | 0                | 0                | MMP13 | P33435  | 10              | 1              | 1                | 1               | 1                | 0                |
| WEE1  | P30291  | 3               | 3              | 3                | 3               | 3                | 3                | ENPL  | P41148  | 10              | 2              | 2                | 2               | 2                | 2                |
| KSYK  | P43405  | 3               | 1              | 1                | 1               | 1                | 1                | MK14  | P47811  | 10              | 2              | 0                | 1               | 0                | 0                |
| MK14  | P47811  | 3               | 2              | 1                | 1               | 1                | 1                | ERR3  | P62508  | 10              | 2              | 2                | 2               | 1                | 2                |
| QDOI  | Q7SIC2  | 3               | 1              | 1                | 1               | 1                | 1                | PDPK1 | O15530  | 11              | 3              | 2                | 2               | 2                | 2                |
| STK6  | O14965  | 4               | 1              | 1                | 1               | 1                | 1                | KAPCA | P05132  | 11              | 1              | 1                | 1               | 1                | 0                |
| PDE5A | O76074  | 4               | 2              | 1                | 1               | 1                | 1                | PNMT  | P11086  | 11              | 2              | 1                | 1               | 1                | 1                |
| TRY1  | P00760  | 4               | 2              | 1                | 1               | 0                | 2                | VDR   | P11473  | 11              | 11             | 11               | 11              | 11               | 11               |
| ESR1  | P03372  | 4               | 4              | 4                | 4               | 4                | 4                | RXRA  | P19793  | 11              | 4              | 4                | 4               | 4                | 4                |
| KAPCA | P05132  | 4               | 2              | 2                | 2               | 1                | 2                | PDE4B | Q07343  | 11              | 2              | 1                | 1               | 1                | 1                |
| PRGR  | P06401  | 4               | 3              | 3                | 3               | 2                | 2                | NRAM  | P06820  | 12              | 1              | 1                | 1               | 1                | 1                |
| MCR   | P08235  | 4               | 4              | 4                | 4               | 4                | 4                | DYR   | P16184  | 12              | 5              | 4                | 5               | 3                | 4                |
| ANDR  | P15207  | 4               | 3              | 3                | 2               | 1                | 1                | ACES  | P21836  | 12              | 1              | 0                | 0               | 0                | 0                |
| COMT  | P22734  | 4               | 1              | 1                | 0               | 0                | 0                | MK01  | P28482  | 12              | 3              | 3                | 3               | 1                | 2                |
| POLG  | P26660  | 4               | 1              | 0                | 0               | 0                | 1                | POL   | P35963  | 12              | 9              | 9                | 8               | 8                | 8                |
| DHI1  | P28845  | 4               | 3              | 3                | 3               | 2                | 2                | AMPM2 | P50579  | 12              | 3              | 1                | 1               | 1                | 1                |
| ENPL  | P41148  | 4               | 1              | 0                | 0               | 0                | 0                | IPNS  | P05326  | 13              | 1              | 0                | 0               | 0                | 0                |
| BLAB  | P52699  | 4               | 1              | 1                | 1               | 1                | 0                | PTPRB | P23467  | 13              | 1              | 1                | 1               | 1                | 1                |
| CPXJ  | Q00441  | 4               | 1              | 1                | 1               | 0                | 0                | NRAM  | P27907  | 13              | 3              | 3                | 3               | 3                | 3                |
| PTGD2 | O60760  | 5               | 1              | 0                | 0               | 0                | 0                | ADA   | P56658  | 13              | 3              | 0                | 1               | 0                | 1                |
| CP51  | P0A512  | 5               | 1              | 1                | 1               | 0                | 0                | TRY1  | P00760  | 14              | 4              | 1                | 2               | 2                | 2                |
| MK10  | P53779  | 5               | 1              | 1                | 1               | 1                | 1                | KITH  | P03176  | 14              | 3              | 3                | 3               | 2                | 2                |
| ADA17 | P78536  | 5               | 2              | 2                | 1               | 2                | 1                | POL   | P04588  | 14              | 9              | 8                | 8               | 8                | 8                |
| PDXK  | P82197  | 5               | 1              | 1                | 0               | 0                | 0                | TGT   | P28720  | 14              | 1              | 1                | 1               | 1                | 1                |
| MTAP  | Q13126  | 5               | 1              | 1                | 1               | 1                | 1                | POL   | P35963  | 14              | 9              | 9                | 9               | 8                | 9                |
| ANDR  | P15207  | 6               | 3              | 3                | 3               | 3                | 3                | MMP12 | P39900  | 14              | 3              | 1                | 0               | 2                | 1                |
| CDK2  | P24941  | 6               | 3              | 2                | 2               | 0                | 1                | KIF11 | P52732  | 14              | 5              | 5                | 4               | 4                | 2                |
| AKT2  | P31751  | 6               | 2              | 2                | 2               | 1                | 1                | FA7   | P08709  | 15              | 2              | 2                | 1               | 2                | 1                |
| KES1  | P35844  | 6               | 4              | 4                | 4               | 4                | 4                | ACES  | P04058  | 16              | 2              | 1                | 1               | 1                | 1                |
| MDM2  | Q00987  | 6               | 1              | 0                | 1               | 0                | 0                | PIM1  | P11309  | 16              | 4              | 1                | 3               | 0                | 1                |
| CDC2H | Q07785  | 6               | 2              | 2                | 2               | 0                | 1                | ALDR  | P15121  | 16              | 9              | 9                | 9               | 9                | 9                |
| ESR1  | P03372  | 7               | 5              | 5                | 5               | 4                | 4                | PPARG | P37231  | 16              | 2              | 2                | 2               | 1                | 1                |
| UNG   | P13051  | 7               | 1              | 1                | 1               | 1                | 1                | BLA1  | P52700  | 16              | 2              | 1                | 0               | 0                | 0                |
| VDR   | P13053  | 7               | 6              | 6                | 6               | 6                | 6                | PDE4D | Q08499  | 16              | 1              | 0                | 0               | 0                | 0                |
| RARG2 | P22932  | 7               | 5              | 5                | 5               | 5                | 5                | ESR2  | Q92731  | 16              | 3              | 3                | 3               | 1                | 1                |
| CFI1  | P28012  | 7               | 1              | 1                | 1               | 1                | 1                | UROK  | P00749  | 18              | 5              | 3                | 4               | 2                | 3                |
| AEQ2  | P02592  | 8               | 4              | 4                | 4               | 4                | 4                | HS90A | P07900  | 18              | 13             | 3                | 3               | 3                | 3                |
| TETR4 | P0ACT4  | 8               | 1              | 1                | 1               | 1                | 1                | MYS2  | P08799  | 18              | 1              | 1                | 1               | 0                | 0                |
| CDK2  | P24941  | 8               | 4              | 3                | 3               | 3                | 2                | CHK1  | O14757  | 19              | 7              | 5                | 5               | 5                | 5                |
| DCK   | P27707  | 8               | 1              | 1                | 1               | 0                | 0                | PTN1  | P18031  | 19              | 2              | 2                | 2               | 2                | 2                |
| RABP2 | P29373  | 8               | 4              | 3                | 2               | 2                | 1                | MMP8  | P22894  | 19              | 3              | 1                | 0               | 0                | 0                |
| PK3CG | P48736  | 8               | 2              | 2                | 2               | 2                | 2                | BGLA  | Q08638  | 19              | 1              | 0                | 0               | 0                | 0                |
| PYRD  | Q02127  | 8               | 2              | 2                | 2               | 2                | 2                | THRB  | P00734  | 20              | 5              | 3                | 2               | 3                | 4                |

|       |        |   |   |   |   |   |   |      |        |    |   |   |   |   |   |
|-------|--------|---|---|---|---|---|---|------|--------|----|---|---|---|---|---|
| DYR   | P00374 | 9 | 3 | 2 | 2 | 1 | 2 | FA10 | P00742 | 20 | 8 | 8 | 7 | 7 | 6 |
| DYR   | P00374 | 9 | 1 | 1 | 1 | 1 | 1 | INHA | P0A5Y6 | 20 | 4 | 4 | 4 | 4 | 4 |
| SRC   | P00523 | 9 | 1 | 0 | 0 | 1 | 0 | AMPM | P0AE18 | 20 | 1 | 0 | 0 | 0 | 1 |
| RETBP | P02753 | 9 | 1 | 1 | 1 | 1 | 1 | RENI | P00797 | 22 | 5 | 4 | 3 | 4 | 5 |
| FA11  | P03951 | 9 | 3 | 3 | 3 | 3 | 3 | ALBU | P02768 | 23 | 1 | 0 | 0 | 0 | 0 |
| GRIK1 | P22756 | 9 | 2 | 2 | 2 | 0 | 0 | NOS1 | P29476 | 23 | 1 | 1 | 0 | 1 | 0 |
| AK1C3 | P42330 | 9 | 1 | 1 | 1 | 0 | 0 | POLG | P26662 | 28 | 1 | 1 | 1 | 0 | 1 |
|       |        |   |   |   |   |   |   | DPP4 | P27487 | 29 | 1 | 0 | 1 | 1 | 0 |

<sup>a</sup> Receptor Structures/Conformations; <sup>b</sup> Ligands; <sup>c</sup> Multiple Receptor Conformations Docking Results – Cognate Receptor Included; <sup>d</sup> 4D Docking Results – Cognate Receptor Included; <sup>e</sup> Multiple Receptor Conformations Docking Results – Cognate Receptor Excluded; <sup>f</sup> 4D Docking Results – Cognate Receptor Excluded.

**Can cluster analysis improve the 4D Docking performance?** In order to improve the 4D docking accuracy when a large number of conformers were included in the calculation, a hierarchical cluster analysis was carried out on each ensemble before building the 4D grids. The distance between two conformers was measured as the RMSD among the positions of the non-hydrogen atoms in the binding site side chains. According to the average linkage partition function, two structures were considered part of the same cluster when the distance between them was lower than a given threshold. Two thresholds, 0.5 Å and 1.0 Å, were used to provide a functional partition. When a 0.5 Å threshold was considered, the average number of conformations in each ensemble decreased by 30%. The overall success rate decreased from 77.3 % to 74 %. When a 1.0 Å threshold was considered, the average number of conformations in each ensemble decreased by 62 %. The success rate decreased from 77.3 % to 68.6 %. Neither of the two partitions was able to improve the 4D docking performance (see also Figure 1S).

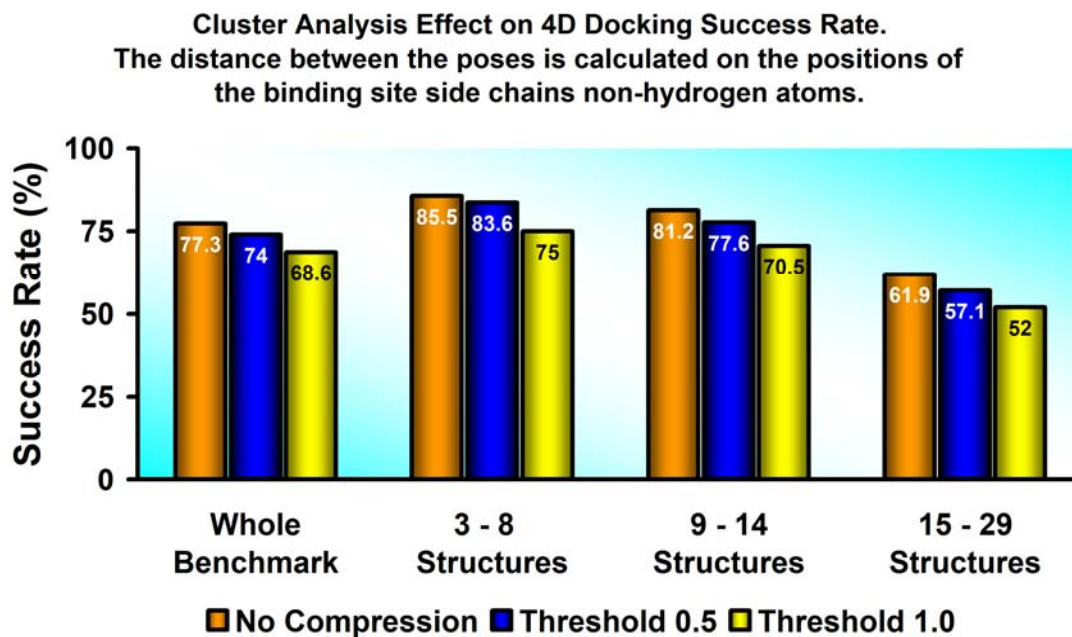

**Figure 1S.** Effects of geometrical hierarchical cluster analysis performed on the receptor conformers on the 4D docking accuracy. General results for the whole benchmark as well as detailed results according to the initial ensemble size are reported. The 4D docking accuracy rate when no cluster analysis, when a cluster analysis with a grouping distance of 0.5 Å, and a cluster analysis with a grouping distance of 1.0 Å are performed, are reported in orange, blue, and yellow histograms, respectively. Cognate receptors are included in the calculations.
